# Supplementary material for: The epidemiology of pediatric oncology and hematopoietic cell transplant admissions to U.S. intensive care units from 2001-2019
Source: PubMed Central journal article supplement (PMC11653354; doi:10.3389/fonc.2024.1501977), 2024-12-03
Supplement: DataSheet1.pdf [file DataSheet1.pdf]

## Online-only Supplement

|                                                                                                                                                                       |             |
|-----------------------------------------------------------------------------------------------------------------------------------------------------------------------|-------------|
| <b>eTable 1:</b> States that contributed to the Healthcare Cost and Utilization Project dataset by year                                                               | Page 2      |
| <b>eTable 2:</b> International Classification of Disease Clinical Modification -9 and -10 codes for classification of disease                                         | Pages 3-4   |
| <b>eTable 3:</b> Patient characteristics and outcomes by hospital type                                                                                                | Pages 5-6   |
| <b>eTable 4:</b> Chronic comorbid conditions among pediatric oncology and hematopoietic cell transplant patients admitted to U.S. intensive care units from 2001-2019 | Pages 7-8   |
| <b>eTable 5:</b> Organ failure type by diagnosis category by year                                                                                                     | Page 9      |
| <b>eTable 6:</b> Intensive care unit resource use by diagnosis group by year                                                                                          | Page 10     |
| <b>eTable 7:</b> Clinical characteristics and outcomes of individual cancer diagnosis types                                                                           | Pages 11-12 |
| <b>eFigure 1:</b> Prevalence of multiorgan dysfunction syndrome among intensive care unit pediatric patients by diagnosis                                             | Page 13     |

**eTable 1: States that contributed to the Healthcare Cost and Utilization Project dataset by year**

| 2001          | 2005           | 2010           | 2016           | 2019           |
|---------------|----------------|----------------|----------------|----------------|
|               |                | Arkansas       | Arkansas       | Arkansas       |
|               |                |                | Delaware       | Delaware       |
|               |                | Georgia        | Georgia        | Georgia        |
|               |                | Iowa           | Iowa           | Iowa           |
| Kentucky      | Kentucky       | Kentucky       | Kentucky       | Kentucky       |
| Massachusetts | Massachusetts  | Massachusetts  | Massachusetts  | Massachusetts  |
|               |                | Maryland       | Maryland       | Maryland       |
| Maine         |                |                |                |                |
|               |                | Minnesota      | Minnesota      | Minnesota      |
|               |                | Mississippi    | Mississippi    |                |
|               | North Carolina | North Carolina | North Carolina | North Carolina |
| Nebraska      | Nebraska       | Nebraska       | Nebraska       | Nebraska       |
|               |                | New Jersey     | New Jersey     | New Jersey     |
|               |                |                | New Mexico     | New Mexico     |
|               | Nevada         |                | Nevada         | Nevada         |
| New York      | New York       | New York       | New York       | New York       |
|               |                | Oregon         | Oregon         | Oregon         |
|               |                |                | Utah           |                |
| Washington    | Washington     | Washington     | Washington     | Washington     |
|               |                | Wisconsin      | Wisconsin      | Wisconsin      |
| West Virginia | West Virginia  | West Virginia  | West Virginia  | West Virginia  |

**eTable 2: International Classification of Disease Clinical Modification -9 and -10 codes for classification of disease**

| <b>ICD-CM-9</b>                     |                                                               |                                                                                                                                       |
|-------------------------------------|---------------------------------------------------------------|---------------------------------------------------------------------------------------------------------------------------------------|
| <b>Immunocompromised Category</b>   | <b>Subclassification</b>                                      | <b>Code</b>                                                                                                                           |
| Hematologic Malignancy              | Acute Lymphoid Leukemia                                       | 204.0, V10.61                                                                                                                         |
|                                     | Acute Myeloid Leukemia                                        | 205.0, V10.62                                                                                                                         |
|                                     | Chronic Myeloid Leukemia                                      | 205.1                                                                                                                                 |
|                                     | Hodgkins Lymphoma                                             | 201.x, V10.72                                                                                                                         |
|                                     | Non-Hodgkins Lymphoma                                         | 200.x (except for 200.2), 202.x                                                                                                       |
|                                     | Burkitt Lymphoma                                              | 200.2                                                                                                                                 |
|                                     | Myelodysplastic Syndrome                                      | 238.7                                                                                                                                 |
|                                     | Other Hematologic Malignancy                                  | 203.x-208.x (except for 204.0 and 205.0), V10.63                                                                                      |
| Solid Malignancy                    | Brain Tumor                                                   | 191.x, 192.x, 194.4, 239.6, V10.85                                                                                                    |
|                                     | Osteosarcoma                                                  | 170.x, V10.81                                                                                                                         |
|                                     | Soft Tissue Sarcoma                                           | 171.x, 239.2                                                                                                                          |
|                                     | Neuroblastoma                                                 | 194.x                                                                                                                                 |
|                                     | Nephroblastoma                                                | 189.x, V10.52                                                                                                                         |
|                                     | Hepatoblastoma                                                | 155.x, V10.07                                                                                                                         |
|                                     | Other Solid Malignancy                                        | 140.x-165.x (except for 155.x), 172.x-190.x, 193.x-199.x (except for 194.4), 239.x (except for 239.2), V10.29, V10.41, V10.43, V10.47 |
| Congenital Immunodeficiency         | Severe Combined Immunodeficiency                              | 279.2                                                                                                                                 |
|                                     | Non-SCID Immunodeficiency                                     | 42.x, 279.0, 279.1, V08                                                                                                               |
| Aplastic Anemia                     |                                                               | 284.x (except for 284.01 and 284.81)                                                                                                  |
| Hemophagocytic Lymphohistiocytosis  |                                                               | 288.4                                                                                                                                 |
| Transplant                          | Bone marrow transplant                                        | V42.81                                                                                                                                |
| <b>ICD-CM-10</b>                    |                                                               |                                                                                                                                       |
| <b>Immunocompromised Category</b>   | <b>Subclassification</b>                                      | <b>Code</b>                                                                                                                           |
| Hematologic Malignancy              | Acute Lymphoid Leukemia                                       | C91                                                                                                                                   |
|                                     | Myeloid Leukemia                                              | C92                                                                                                                                   |
|                                     | Acute Myeloid Leukemia with multilineage dysplasia            | C92.A                                                                                                                                 |
|                                     | Chronic Myeloid Leukemia (BCR/ABL +)                          | C92.1                                                                                                                                 |
|                                     | Atypical Chronic Myeloid Leukemia (BCR/ABL -)                 | C92.2                                                                                                                                 |
|                                     | Hodgkin Lymphoma                                              | C81                                                                                                                                   |
|                                     | Follicular Lymphoma                                           | C82                                                                                                                                   |
|                                     | Non-follicular Lymphoma (including Burkitt)                   | C83                                                                                                                                   |
|                                     | Other specified and unspecified types of non-Hodgkin Lymphoma | C85                                                                                                                                   |
|                                     | Myelodysplastic Syndrome                                      | D46                                                                                                                                   |
|                                     | Solid Malignancy                                              | Brain Tumor                                                                                                                           |
| Spinal cord and cranial nerve tumor |                                                               | C72                                                                                                                                   |

| Immunocompromised Category         | Subclassification                                    | Code                |
|------------------------------------|------------------------------------------------------|---------------------|
|                                    | Osteosarcoma (limbs)                                 | C40                 |
|                                    | Osteosarcoma (unspecified sites)                     | C41                 |
|                                    | Peripheral nerves and autonomic nervous system tumor | C47                 |
|                                    | Retroperitoneum and peritoneum tumor                 | C48                 |
|                                    | Connective and soft tissue tumor                     | C49                 |
|                                    | Neuroblastoma (adrenal glands)                       | C74                 |
|                                    | Nephroblastoma                                       | C64, C65            |
|                                    | Hepatoblastoma                                       | C22.2               |
|                                    | Digestive organ tumors                               | C15-C26             |
| Congenital Immunodeficiency        | Severe Combined Immunodeficiency                     | D81.0, D81.1, D81.2 |
|                                    | Non-SCID Immunodeficiency                            | D82                 |
| Aplastic Anemia                    | Aplastic Anemia, unspecified                         | D61.9               |
| Hemophagocytic Lymphohistiocytosis |                                                      | D76.1               |
| Transplant                         | History of bone marrow transplant                    | Z94.81, Z94.84      |

<sup>a</sup> Where three-digit and four-digit codes are listed, all associated subcodes are also included unless otherwise specified. ICD-CM-9 and -10 = International Classification of Disease Clinical Modification

**eTable 3: Patient characteristics and outcomes by hospital type**

| Patient characteristic                            | 2001       | 2005              | 2010              | 2016              | 2019              | p-value |
|---------------------------------------------------|------------|-------------------|-------------------|-------------------|-------------------|---------|
| <b>Children's Hospital Admissions, No. (%)</b>    |            |                   |                   |                   |                   |         |
| Oncology (total)                                  | 878 (62.5) | 1239 (74.5)       | 2431 (81.4)       | 2777 (88.0)       | 1981 (92.9)       | <0.001  |
| RR (95% CI)                                       | Reference  | 1.19 (1.14, 1.25) | 1.30 (1.25, 1.36) | 1.41 (1.35, 1.47) | 1.49 (1.42, 1.55) |         |
| Hematologic Malignancies                          | 288 (64.7) | 439 (74.4)        | 841 (83.0)        | 964 (88.9)        | 764 (92.1)        | <0.001  |
| RR (95% CI)                                       | Reference  | 1.15 (1.06, 1.25) | 1.28 (1.19, 1.38) | 1.37 (1.28, 1.48) | 1.42 (1.32, 1.53) |         |
| Solid Malignancies                                | 592 (61.2) | 802 (74.5)        | 1595 (80.5)       | 1825 (87.5)       | 1221 (93.5)       | <0.001  |
| RR (95% CI)                                       | Reference  | 1.22 (1.15, 1.30) | 1.32 (1.25, 1.39) | 1.43 (1.36, 1.51) | 1.53 (1.45, 1.61) |         |
| HCT                                               | 120 (71.0) | 226 (81.9)        | 489 (89.6)        | 408 (89.1)        | 254 (88.8)        | <0.001  |
| RR (95% CI)                                       | Reference  | 1.15 (1.03, 1.29) | 1.26 (1.14, 1.39) | 1.25 (1.13, 1.39) | 1.25 (1.13, 1.39) |         |
| <b>ICU Admission, No. (% of hospitalizations)</b> |            |                   |                   |                   |                   |         |
| Oncology (total), Children's hospital             | 878 (14.1) | 1239 (14.5)       | 2431 (14.4)       | 2777 (13.5)       | 1981 (13.3)       | 0.003   |
| RR (95% CI)                                       | Reference  | 1.03 (0.95, 1.11) | 1.02 (0.95, 1.10) | 0.96 (0.90, 1.03) | 0.94 (0.88, 1.02) |         |
| Oncology (total), General hospital                | 528 (13.6) | 424 (12.7)        | 557 (14.6)        | 378 (15)          | 151 (14.5)        | 0.025   |
| RR (95% CI)                                       | Reference  | 0.93 (0.83, 1.05) | 1.07 (0.96, 1.19) | 1.10 (0.97, 1.24) | 1.06 (0.90, 1.25) |         |
| HCT, Children's hospital                          | 120 (33.7) | 226 (31.8)        | 489 (27.5)        | 408 (23.6)        | 254 (18.1)        | <0.001  |
| RR (95% CI)                                       | Reference  | 0.94 (0.79, 1.13) | 0.82 (0.69, 0.96) | 0.7 (0.59, 0.83)  | 0.54 (0.44, 0.65) |         |
| HCT, General hospital                             | 49 (14)    | 50 (12.7)         | 57 (18.6)         | 50 (21.9)         | 32 (40.5)         | <0.001  |
| RR (95% CI)                                       | Reference  | 0.91 (0.63, 1.31) | 1.33 (0.94, 1.89) | 1.57 (1.10, 2.25) | 2.9 (2, 4.2)      |         |
| <b>Age of ICU admissions, Median years (IQR)</b>  |            |                   |                   |                   |                   |         |
| Oncology & HCT, Children's hospital               | 7 (3, 12)  | 7 (3, 13)         | 7 (3, 12)         | 8 (3, 13)         | 8 (3, 13)         | <0.001  |
| RR (95% CI)                                       | Reference  | 1.01 (0.95, 1.07) | 1.02 (0.97, 1.07) | 1.07 (1.02, 1.13) | 1.07 (1.01, 1.13) |         |
| Oncology & HCT, General hospital                  | 7 (3, 13)  | 7 (3, 13)         | 7 (2, 13)         | 8 (3, 13)         | 8.5 (5, 14)       | 0.144   |
| RR (95% CI)                                       | Reference  | 1.02 (0.94, 1.11) | 0.97 (0.90, 1.06) | 1.03 (0.95, 1.12) | 1.13 (1.02, 1.25) |         |
| <b>Chronic comorbidities, No (%)</b>              |            |                   |                   |                   |                   |         |
| Oncology & HCT, Children's hospital               | 418 (45.3) | 660 (49.2)        | 1,583 (58.7)      | 2,031 (68.1)      | 1,519 (71.7)      | <0.001  |
| RR (95% CI)                                       | Reference  | 1.09 (0.99, 1.19) | 1.30 (1.20, 1.4)  | 1.50 (1.39, 1.62) | 1.58 (1.47, 1.71) |         |
| Oncology & HCT, General hospital                  | 234 (43.2) | 218 (48.4)        | 276 (47.8)        | 236 (58.1)        | 105 (64.8)        | <0.001  |
| RR (95% CI)                                       | Reference  | 1.12 (0.98, 1.29) | 1.11 (0.97, 1.26) | 1.34 (1.19, 1.53) | 1.5 (1.29, 1.74)  |         |

| <b>Patient characteristic (continued)</b>             | <b>2001</b>             | <b>2005</b>          | <b>2010</b>          | <b>2016</b>          | <b>2019</b>          | <b>p-value</b> |
|-------------------------------------------------------|-------------------------|----------------------|----------------------|----------------------|----------------------|----------------|
| <b>Hospitalization cost in 2019 USD, Median (IQR)</b> |                         |                      |                      |                      |                      |                |
| Oncology & HCT, Children's hospital                   | 27067<br>(13308, 63152) | 30539 (14596, 68142) | 31818 (16187, 68805) | 45993 (23292, 92860) | 44859 (23016, 90092) |                |
| Oncology & HCT, General hospital                      | 22762<br>(13520, 45282) | 26837 (12256, 49739) | 24500 (12668, 42773) | 43451 (21192, 70524) | 32535 (15609, 66139) |                |
| <b>In-hospital mortality, No (%)</b>                  |                         |                      |                      |                      |                      |                |
| Oncology (total), Children's hospital                 | 47 (5.4)                | 72 (5.8)             | 108 (4.4)            | 136 (4.9)            | 112 (5.7)            | 0.94           |
| RR (95% CI)                                           | Reference               | 1.08 (0.76, 1.55)    | 0.83 (0.59, 1.16)    | 0.91 (0.66, 1.26)    | 1.06 (0.76, 1.47)    |                |
| Oncology (total), General hospital                    | 33 (6.3)                | 28 (6.6)             | 14 (2.5)             | 23 (6.1)             | 7 (4.6)              | 0.22           |
| RR (95% CI)                                           | Reference               | 1.06 (0.65, 1.72)    | 0.40 (0.22, 0.74)    | 0.97 (0.58, 1.63)    | 0.74 (0.33, 1.64)    |                |
| HCT, Children's hospital                              | 13 (10.8)               | 25 (11.1)            | 42 (8.6)             | 39 (9.6)             | 21 (8.3)             | 0.36           |
| RR (95% CI)                                           | Reference               | 1.02 (0.54, 1.92)    | 0.79 (0.44, 1.43)    | 0.88 (0.49, 1.60)    | 0.76 (0.40, 1.47)    |                |
| HCT, General hospital                                 | 8 (16.3)                | 10 (20)              | 1 (1.8)              | 4 (8)                | 0 (0)                | 0.002          |
| RR (95% CI)                                           | Reference               | 1.22 (0.53, 2.85)    | 0.11 (0.01, 0.83)    | 0.49 (0.16, 1.53)    | -                    |                |

HCT = hematopoietic stem cell transplant, IQR = interquartile range, No. = number, RR = relative risk, - = unable to calculate.

**eTable 4: Chronic comorbid conditions among pediatric oncology and hematopoietic cell transplant patients admitted to U.S. intensive care units from 2001-2019**

| <b>Chronic Comorbidity, No. (%)</b> | <b>2001</b> | <b>2004</b> | <b>2010</b> | <b>2016</b> | <b>2019</b> |
|-------------------------------------|-------------|-------------|-------------|-------------|-------------|
| <b>Oncology (total)</b>             |             |             |             |             |             |
| Cardiovascular                      | 168 (12)    | 240 (14.1)  | 325 (10.9)  | 443 (13.9)  | 281 (12.7)  |
| Genetic                             | 30 (2.1)    | 37 (2.2)    | 114 (3.8)   | 116 (3.6)   | 107 (4.8)   |
| Gastrointestinal                    | 69 (4.9)    | 110 (6.5)   | 235 (7.9)   | 371 (11.6)  | 304 (13.7)  |
| Metabolic                           | 75 (5.3)    | 100 (5.9)   | 469 (15.7)  | 741 (23.2)  | 566 (25.5)  |
| Neuromuscular                       | 255 (18.1)  | 326 (19.1)  | 725 (24.3)  | 944 (29.5)  | 655 (29.5)  |
| Renal                               | 177 (12.6)  | 233 (13.7)  | 458 (15.3)  | 435 (13.6)  | 412 (18.6)  |
| Respiratory                         | 21 (1.5)    | 31 (1.8)    | 59 (2)      | 116 (3.6)   | 89 (4)      |
| Technology dependence <sup>a</sup>  | 374 (26.6)  | 525 (30.8)  | 829 (27.7)  | 1078 (33.7) | 817 (36.8)  |
| <b>Hematologic Malignancy</b>       |             |             |             |             |             |
| Cardiovascular                      | 95 (21.4)   | 123 (20.5)  | 145 (14.3)  | 199 (17.9)  | 136 (15.4)  |
| Genetic                             | 18 (4.0)    | 20 (3.3)    | 60 (5.9)    | 59 (5.3)    | 72 (8.1)    |
| Gastrointestinal                    | 19 (4.3)    | 28 (4.7)    | 71 (7.0)    | 100 (9.0)   | 101 (11.4)  |
| Metabolic                           | 31 (7.0)    | 36 (6.0)    | 211 (20.8)  | 393 (35.4)  | 314 (35.5)  |
| Neuromuscular                       | 18 (4.0)    | 26 (4.3)    | 58 (5.7)    | 79 (7.1)    | 60 (6.8)    |
| Renal                               | 78 (17.5)   | 94 (15.7)   | 180 (17.8)  | 158 (14.3)  | 192 (21.7)  |
| Respiratory                         | 9 (2.0)     | 4 (0.7)     | 11 (1.1)    | 21 (1.9)    | 27 (3.1)    |
| Technology dependence <sup>a</sup>  | 139 (31.2)  | 179 (29.9)  | 231 (22.8)  | 273 (24.6)  | 263 (29.8)  |
| <b>Solid Malignancy</b>             |             |             |             |             |             |
| Cardiovascular                      | 73 (7.5)    | 117 (10.5)  | 180 (9.1)   | 246 (11.7)  | 145 (10.8)  |
| Genetic                             | 12 (1.2)    | 17 (1.5)    | 54 (2.7)    | 57 (2.7)    | 35 (2.6)    |
| Gastrointestinal                    | 50 (5.2)    | 83 (7.5)    | 164 (8.3)   | 273 (13.0)  | 204 (15.2)  |
| Metabolic                           | 45 (4.7)    | 64 (5.8)    | 260 (13.1)  | 352 (16.7)  | 253 (18.9)  |
| Neuromuscular                       | 237 (24.5)  | 300 (27.0)  | 668 (33.7)  | 870 (41.4)  | 596 (44.4)  |
| Renal                               | 100 (10.3)  | 140 (12.6)  | 281 (14.2)  | 283 (13.5)  | 222 (16.6)  |
| Respiratory                         | 12 (1.2)    | 27 (2.4)    | 48 (2.4)    | 95 (4.5)    | 62 (4.6)    |
| Technology dependence <sup>a</sup>  | 236 (24.4)  | 348 (31.4)  | 602 (30.4)  | 809 (38.5)  | 556 (41.5)  |
| <b>HCT</b>                          |             |             |             |             |             |
| Cardiovascular                      | 34 (20.1)   | 69 (24.6)   | 70 (12.8)   | 75 (16.2)   | 33 (11.3)   |
| Genetic                             | 4 (2.4)     | 5 (1.8)     | 33 (6)      | 33 (7.1)    | 14 (4.8)    |
| Gastrointestinal                    | 13 (7.7)    | 32 (11.4)   | 85 (15.6)   | 109 (23.6)  | 93 (31.9)   |
| Metabolic                           | 17 (10.1)   | 37 (13.2)   | 108 (19.8)  | 157 (34)    | 97 (33.2)   |
| Neuromuscular                       | 9 (5.3)     | 31 (11.1)   | 71 (13)     | 75 (16.2)   | 49 (16.8)   |

| <b>Chronic Comorbidity, No. (%)</b> | <b>2001</b> | <b>2004</b> | <b>2010</b> | <b>2016</b> | <b>2019</b> |
|-------------------------------------|-------------|-------------|-------------|-------------|-------------|
| <b>HCT (continued)</b>              |             |             |             |             |             |
| Renal                               | 15 (8.9)    | 30 (10.7)   | 64 (11.7)   | 49 (10.6)   | 75 (25.7)   |
| Respiratory                         | 6 (3.6)     | 12 (4.3)    | 20 (3.7)    | 15 (3.3)    | 11 (3.8)    |
| Technology dependence <sup>a</sup>  | 46 (27.2)   | 94 (33.6)   | 148 (27.1)  | 200 (43.3)  | 152 (52.1)  |

HCT = hematopoietic stem cell transplant, No. = number. <sup>a</sup> Technology dependence defined according to Pediatric Complex Chronic Conditions and includes devices such as tracheostomies, gastrostomies, colostomies, ventricular shunts, dialysis access, and pacemakers.



**eTable 5: Organ failure type by diagnosis category by year**

| <b>Organ failure, No. (%)</b> | <b>2001</b> | <b>2004</b> | <b>2010</b> | <b>2016</b> | <b>2019</b> |
|-------------------------------|-------------|-------------|-------------|-------------|-------------|
| <b>Oncology (total)</b>       |             |             |             |             |             |
| Cardiovascular                | 128 (9.1)   | 194 (11.4)  | 520 (17.4)  | 781 (24.4)  | 565 (25.4)  |
| Hepatic                       | 7 (0.5)     | 17 (1.0)    | 32 (1.1)    | 51 (1.6)    | 51 (2.3)    |
| Neuromuscular                 | 247 (17.6)  | 299 (17.5)  | 887 (29.7)  | 1209 (37.8) | 831 (37.4)  |
| Renal                         | 56 (4.0)    | 72 (4.2)    | 147 (4.9)   | 306 (9.6)   | 256 (11.5)  |
| Respiratory                   | 163 (11.6)  | 207 (12.1)  | 517 (17.3)  | 692 (21.7)  | 584 (26.3)  |
| <b>Hematologic Malignancy</b> |             |             |             |             |             |
| Cardiovascular                | 80 (18.0)   | 108 (18.0)  | 284 (28.0)  | 407 (36.7)  | 323 (36.5)  |
| Hepatic                       | 4 (0.9)     | 11 (1.8)    | 22 (2.2)    | 29 (2.6)    | 32 (3.6)    |
| Neuromuscular                 | 89 (20.0)   | 89 (14.9)   | 394 (38.9)  | 503 (45.4)  | 369 (41.7)  |
| Renal                         | 43 (9.7)    | 50 (8.4)    | 107 (10.6)  | 211 (19.0)  | 181 (20.5)  |
| Respiratory                   | 80 (18.0)   | 105 (17.5)  | 228 (22.5)  | 301 (27.1)  | 295 (33.4)  |
| <b>Solid Malignancy</b>       |             |             |             |             |             |
| Cardiovascular                | 49 (5.1)    | 86 (7.8)    | 237 (12.0)  | 380 (18.1)  | 243 (18.1)  |
| Hepatic                       | 3 (0.3)     | 7 (0.6)     | 10 (0.5)    | 22 (1.1)    | 19 (1.4)    |
| Neuromuscular                 | 158 (16.3)  | 210 (18.9)  | 493 (24.9)  | 714 (34.0)  | 464 (34.6)  |
| Renal                         | 14 (1.5)    | 24 (2.2)    | 42 (2.1)    | 99 (4.7)    | 76 (5.7)    |
| Respiratory                   | 85 (8.8)    | 103 (9.3)   | 292 (14.7)  | 395 (18.8)  | 291 (21.7)  |
| <b>HCT</b>                    |             |             |             |             |             |
| Cardiovascular                | 19 (11.2)   | 53 (18.9)   | 136 (24.9)  | 160 (34.6)  | 88 (30.1)   |
| Hepatic                       | 2 (1.2)     | 3 (1.1)     | 8 (1.5)     | 8 (1.7)     | 7 (2.4)     |
| Neuromuscular                 | 41 (24.3)   | 62 (22.1)   | 133 (24.4)  | 173 (37.5)  | 98 (33.6)   |
| Renal                         | 14 (8.3)    | 18 (6.4)    | 66 (12.1)   | 77 (16.7)   | 59 (20.2)   |
| Respiratory                   | 28 (16.6)   | 56 (20.0)   | 137 (25.1)  | 137 (29.7)  | 91 (31.2)   |

HCT = hematopoietic stem cell transplant, No. = number.

**eTable 6: Intensive care unit resource use by diagnosis group by year**

| Device                        | 2001       | 2004             | 2010             | 2016             | 2019             |
|-------------------------------|------------|------------------|------------------|------------------|------------------|
| <b>Mechanical Ventilation</b> |            |                  |                  |                  |                  |
| Oncology (total)              | 168 (12.0) | 196 (11.5)       | 393 (13.2)       | 414 (13.0)       | 279 (12.6)       |
| RR (95% CI)                   | Reference  | 0.96 (0.79-1.17) | 1.10 (0.93-1.30) | 1.08 (0.92-1.28) | 1.05 (0.88-1.26) |
| Hematologic Malignancy        | 69 (15.5)  | 81 (13.5)        | 143 (14.1)       | 175 (15.8)       | 119 (13.5)       |
| RR (95% CI)                   | Reference  | 0.87 (0.65-1.17) | 0.91 (0.70-1.19) | 1.02 (0.79-1.31) | 0.87 (0.66-1.14) |
| Solid Malignancy              | 102 (10.5) | 115 (10.4)       | 251 (12.7)       | 241 (11.5)       | 162 (12.1)       |
| RR (95% CI)                   | Reference  | 0.98 (0.76-1.27) | 1.20 (0.97-1.49) | 1.09 (0.87-1.35) | 1.15 (0.91-1.45) |
| HCT                           | 22 (13.0)  | 39 (13.9)        | 78 (14.3)        | 75 (16.2)        | 38 (13.0)        |
| RR (95% CI)                   | Reference  | 1.07 (0.66-1.74) | 1.10 (0.71-1.71) | 1.25 (0.80-1.94) | 1.00 (0.61-1.63) |
| <b>Dialysis</b>               |            |                  |                  |                  |                  |
| Oncology (total)              | 16 (1.1)   | 24 (1.4)         | 42 (1.4)         | 47 (1.54)        | 83 (3.76)        |
| RR (95% CI)                   | Reference  | 1.24 (0.66-2.32) | 1.24 (0.70-2.19) | 1.29 (0.74-2.27) | 3.28 (1.93-5.58) |
| Hematologic Malignancy        | 10 (2.3)   | 17 (2.8)         | 33 (3.3)         | 38 (3.4)         | 63 (7.1)         |
| RR (95% CI)                   | Reference  | 1.26 (0.58-2.73) | 1.45 (0.72-2.92) | 1.52 (0.77-3.03) | 3.17 (1.64-6.12) |
| Solid Malignancy              | 6 (0.6)    | 8 (0.7)          | 9 (0.5)          | 11 (0.5)         | 20 (1.5)         |
| RR (95% CI)                   | Reference  | 1.16 (0.40-3.34) | 0.73 (0.26-2.05) | 0.84 (0.31-2.28) | 2.41 (0.97-5.97) |
| HCT                           | 5 (3.0)    | 8 (2.9)          | 21 (3.9)         | 9 (2.0)          | 23 (7.9)         |
| RR (95% CI)                   | Reference  | 0.97 (0.32-2.9)  | 1.30 (0.50-3.40) | 0.66 (0.22-1.94) | 2.67 (1.03-6.87) |
| <b>ECMO</b>                   |            |                  |                  |                  |                  |
| Oncology (total)              | 4 (0.3)    | 2 (0.1)          | 6 (0.2)          | 9 (0.3)          | 16 (0.7)         |
| RR (95% CI)                   | Reference  | 0.41 (0.08-2.25) | 0.71 (0.20-2.50) | 1.0 (0.31-3.21)  | 2.53 (0.85-7.56) |
| Hematologic Malignancy        | 1 (0.2)    | 2 (0.3)          | 5 (0.5)          | 8 (0.7)          | 11 (1.2)         |
| RR (95% CI)                   | Reference  | 1.49 (0.14-16.3) | 2.20 (0.26-18.8) | 3.21 (0.40-25.6) | 5.53 (0.72-42.8) |
| Solid Malignancy              | 3 (0.3)    | 0 (0)            | 1 (0.1)          | 1 (0.1)          | 5 (0.4)          |
| RR (95% CI)                   | Reference  | -                | -                | -                | -                |
| HCT                           | 1 (0.6)    | 0 (0)            | 1 (0.2)          | 1 (0.2)          | 3 (1.0)          |
| RR (95% CI)                   | Reference  | -                | -                | -                | -                |

ECMO = extracorporeal membrane oxygenation, HCT = hematopoietic stem cell transplant, No. = number. - = unable to calculate

**eTable 7: Clinical characteristics and outcomes of individual cancer diagnosis types**

| <b>Diagnosis</b>                                             | <b>2001</b> | <b>2004</b> | <b>2010</b> | <b>2016</b> | <b>2019</b> |
|--------------------------------------------------------------|-------------|-------------|-------------|-------------|-------------|
| <b>ICU admission prevalence, No. (% of hospitalizations)</b> |             |             |             |             |             |
| Hematologic Malignancy                                       |             |             |             |             |             |
| ALL                                                          | 262 (8.8)   | 341 (9.2)   | 622 (8.9)   | 672 (8.8)   | 566 (10.4)  |
| AML                                                          | 123 (19.0)  | 159 (16.7)  | 283 (19.1)  | 216 (17.6)  | 129 (17.3)  |
| Lymphoma                                                     | 51 (8.5)    | 95 (12.1)   | 104 (10.0)  | 217 (8.7)   | 164 (10.2)  |
| Other                                                        | 10 (14.1)   | 13 (12.8)   | 18 (10.3)   | 43 (13.3)   | 48 (18.8)   |
| Solid Malignancy                                             |             |             |             |             |             |
| Brain                                                        | 476 (28.9)  | 581 (32.4)  | 993 (33.3)  | 1040 (33.8) | 662 (35.3)  |
| Neuroblastoma                                                | 219 (19.4)  | 215 (17.8)  | 380 (16.5)  | 326 (18.2)  | 182 (13.0)  |
| Hepatoblastoma                                               | 50 (19.5)   | 55 (13.6)   | 117 (19.5)  | 103 (17.0)  | 76 (15.9)   |
| Nephroblastoma                                               | 65 (17.5)   | 77 (15.1)   | 135 (17.4)  | 134 (15.0)  | 111 (18.1)  |
| Bone                                                         | 101 (6.4)   | 125 (6.3)   | 205 (6.6)   | 210 (6.0)   | 120 (4.6)   |
| Muscle                                                       | 57 (6.7)    | 58 (6.8)    | 141 (10.1)  | 81 (7.7)    | 63 (7.5)    |
| Nerve                                                        | 22 (33.7)   | 21 (45.7)   | 45 (60.8)   | 99 (25.9)   | 74 (26.5)   |
| Other                                                        | 61 (6.5)    | 65 (6.5)    | 155 (9.5)   | 466 (18.5)  | 253 (13.7)  |
| HCT                                                          |             |             |             |             |             |
| Oncology                                                     | 110 (22.4)  | 149 (22.5)  | 260 (23.8)  | 226 (22.8)  | 141 (17.0)  |
| Non-oncology                                                 | 59 (27.4)   | 131 (28.7)  | 286 (28.7)  | 236 (24.1)  | 151 (22.5)  |
| <b>MODS, No. (%)</b>                                         |             |             |             |             |             |
| Hematologic Malignancy                                       |             |             |             |             |             |
| ALL                                                          | 45 (17.2)   | 65 (19.1)   | 211 (33.9)  | 308 (45.8)  | 268 (47.4)  |
| AML                                                          | 30 (24.4)   | 38 (23.9)   | 124 (43.8)  | 127 (58.8)  | 83 (63.3)   |
| Lymphoma                                                     | 8 (15.7)    | 11 (11.6)   | 34 (32.7)   | 87 (40.1)   | 67 (40.9)   |
| Other                                                        | 2 (20.0)    | 1 (7.7)     | 4 (22.2)    | 25 (58.1)   | 27 (56.3)   |
| Solid Malignancy                                             |             |             |             |             |             |
| Brain                                                        | 22 (4.6)    | 47 (8.1)    | 104 (10.5)  | 164 (15.8)  | 130 (19.6)  |
| Neuroblastoma                                                | 17 (7.8)    | 22 (10.2)   | 62 (16.3)   | 130 (39.9)  | 56 (30.8)   |
| Hepatoblastoma                                               | 0 (0)       | 6 (10.9)    | 29 (24.8)   | 32 (31.1)   | 32 (42.1)   |
| Nephroblastoma                                               | 1 (1.5)     | 2 (2.6)     | 17 (12.6)   | 28 (20.9)   | 26 (23.4)   |
| Bone                                                         | 2 (2.0)     | 6 (4.8)     | 30 (14.6)   | 68 (32.4)   | 32 (26.7)   |
| Muscle                                                       | 8 (14.0)    | 3 (5.2)     | 25 (17.7)   | 27 (33.3)   | 22 (34.9)   |
| Nerve                                                        | 0 (0)       | 0 (0)       | 6 (13.3)    | 24 (24.2)   | 7 (9.5)     |
| Other                                                        | 9 (14.8)    | 4 (6.2)     | 30 (19.4)   | 148 (31.8)  | 67 (26.5)   |
| HCT                                                          |             |             |             |             |             |
| Oncology                                                     | 15 (13.6)   | 33 (22.2)   | 94 (36.2)   | 111 (49.1)  | 62 (44.0)   |
| Non-oncology                                                 | 6 (10.2)    | 23 (17.6)   | 66 (23.1)   | 79 (33.5)   | 54 (35.8)   |

| <b>Diagnosis (continued)</b>          | <b>2001</b> | <b>2004</b> | <b>2010</b> | <b>2016</b> | <b>2019</b> |
|---------------------------------------|-------------|-------------|-------------|-------------|-------------|
| <b>In-Hospital Mortality, No. (%)</b> |             |             |             |             |             |
| Hematologic Malignancy                |             |             |             |             |             |
| ALL                                   | 20 (7.6)    | 30 (8.8)    | 34 (5.5)    | 36 (5.4)    | 40 (7.1)    |
| AML                                   | 18 (14.6)   | 21 (13.2)   | 38 (13.4)   | 22 (10.2)   | 11 (8.5)    |
| Lymphoma                              | 3 (5.9)     | 7 (7.4)     | 4 (3.9)     | 15 (6.9)    | 4 (2.4)     |
| Other                                 | 1 (10.0)    | 1 (7.7)     | 1 (5.6)     | 4 (9.3)     | 1 (2.1)     |
| Solid Malignancy                      |             |             |             |             |             |
| Brain                                 | 24 (5.1)    | 26 (4.5)    | 28 (2.8)    | 39 (3.8)    | 33 (5.0)    |
| Neuroblastoma                         | 13 (5.9)    | 7 (3.3)     | 4 (1.1)     | 12 (3.7)    | 7 (3.9)     |
| Hepatoblastoma                        | 1 (2.0)     | 4 (7.3)     | 6 (5.1)     | 4 (3.9)     | 0 (0)       |
| Nephroblastoma                        | 1 (1.5)     | 0 (0)       | 1 (0.7)     | 5 (3.7)     | 2 (1.8)     |
| Bone                                  | 1 (1.0)     | 5 (4.0)     | 7 (3.4)     | 9 (4.3)     | 9 (7.5)     |
| Muscle                                | 3 (5.3)     | 5 (8.6)     | 3 (2.1)     | 3 (3.7)     | 9 (14.3)    |
| Nerve                                 | 0 (0)       | 1 (4.8)     | 2 (4.4)     | 5 (5.1)     | 4 (5.4)     |
| Other                                 | 3 (4.9)     | 6 (9.2)     | 4 (2.6)     | 24 (5.2)    | 9 (3.6)     |
| HCT                                   |             |             |             |             |             |
| Oncology                              | 17 (15.5)   | 21 (14.1)   | 28 (10.8)   | 21 (9.3)    | 13 (9.2)    |
| Non-oncology                          | 4 (6.8)     | 14 (10.7)   | 15 (5.3)    | 22 (9.3)    | 8 (5.3)     |

HCT = hematopoietic stem cell transplant, ICU = intensive care unit, MODS = Multiple Organ Dysfunction Syndrome, No. = number.

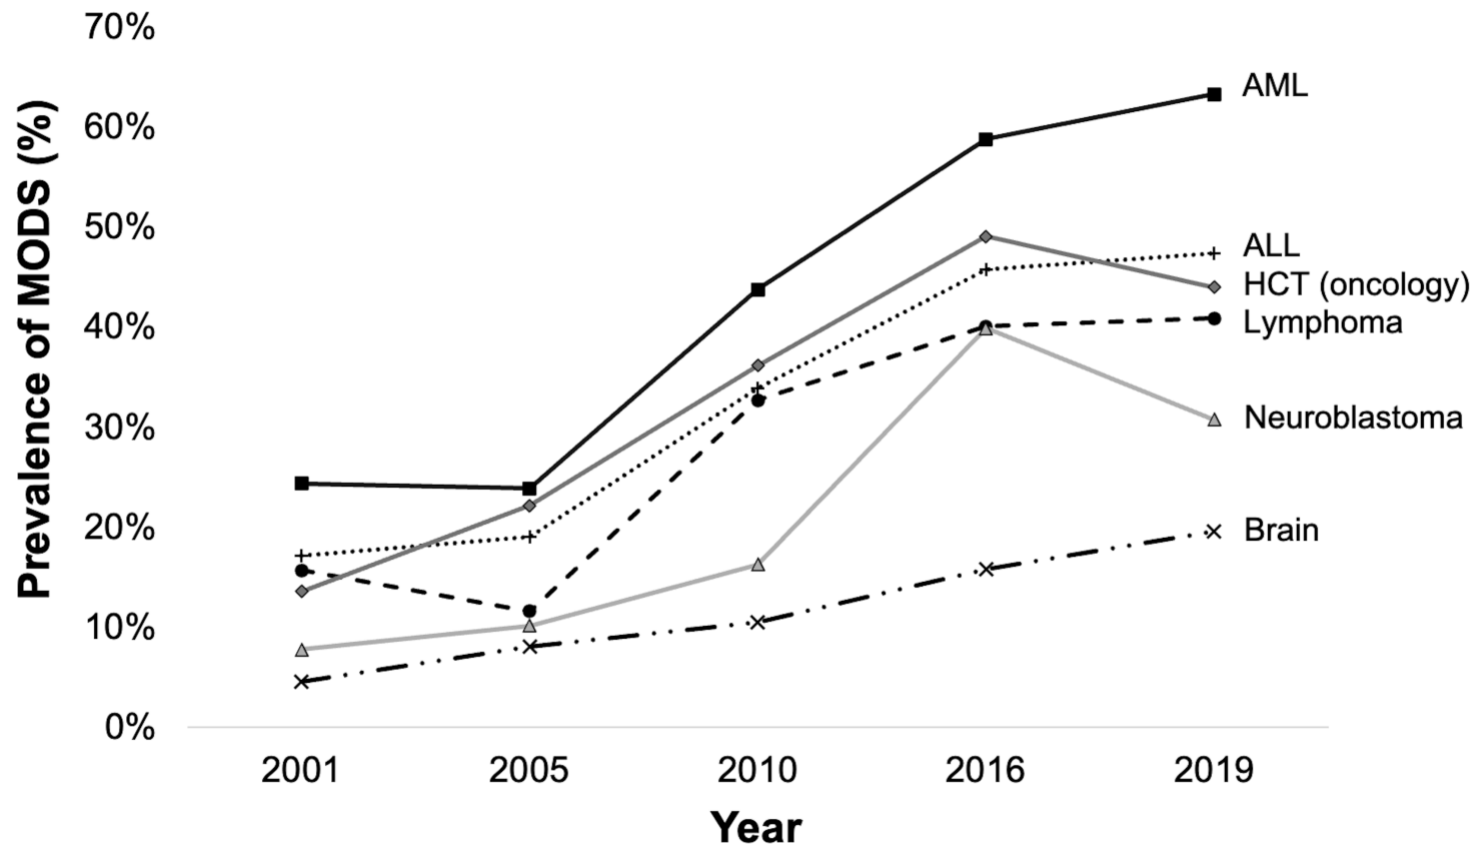

**eFigure 1: prevalence of multiorgan dysfunction syndrome among intensive care unit pediatric patients by diagnosis.**

ALL = acute lymphoblastic leukemia, AML = acute myeloid leukemia, HCT = hematopoietic stem cell transplant, MODS = Multiple Organ Dysfunction Syndrome.
